# Supplementary figures and images for: Stability of the double gyroid phase to nanoparticle polydispersity in polymer-tethered nanosphere systems
Source: Royal Society of Chemistry journal article supplement (doi:10.1039/b911140a), 2010-01-01

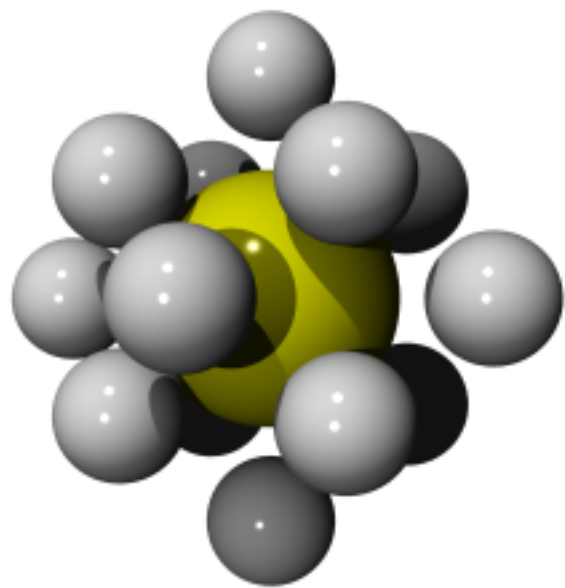

(a)

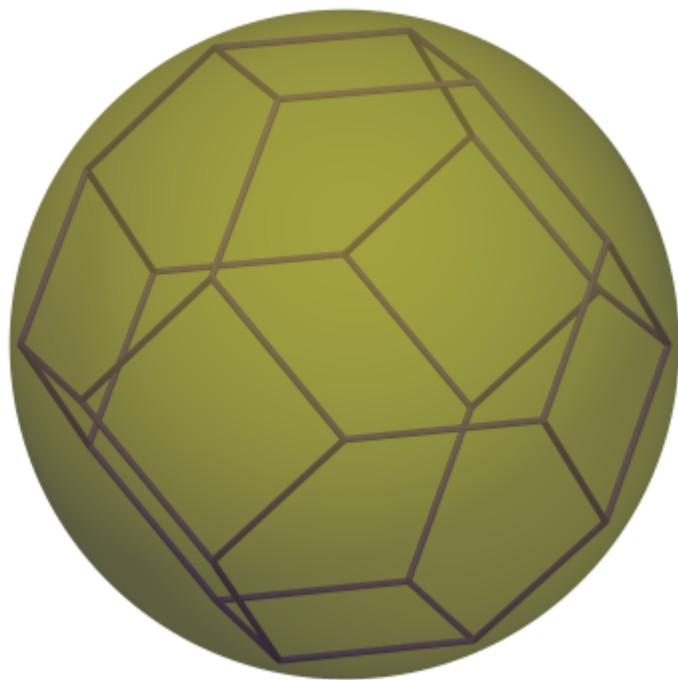

(b)

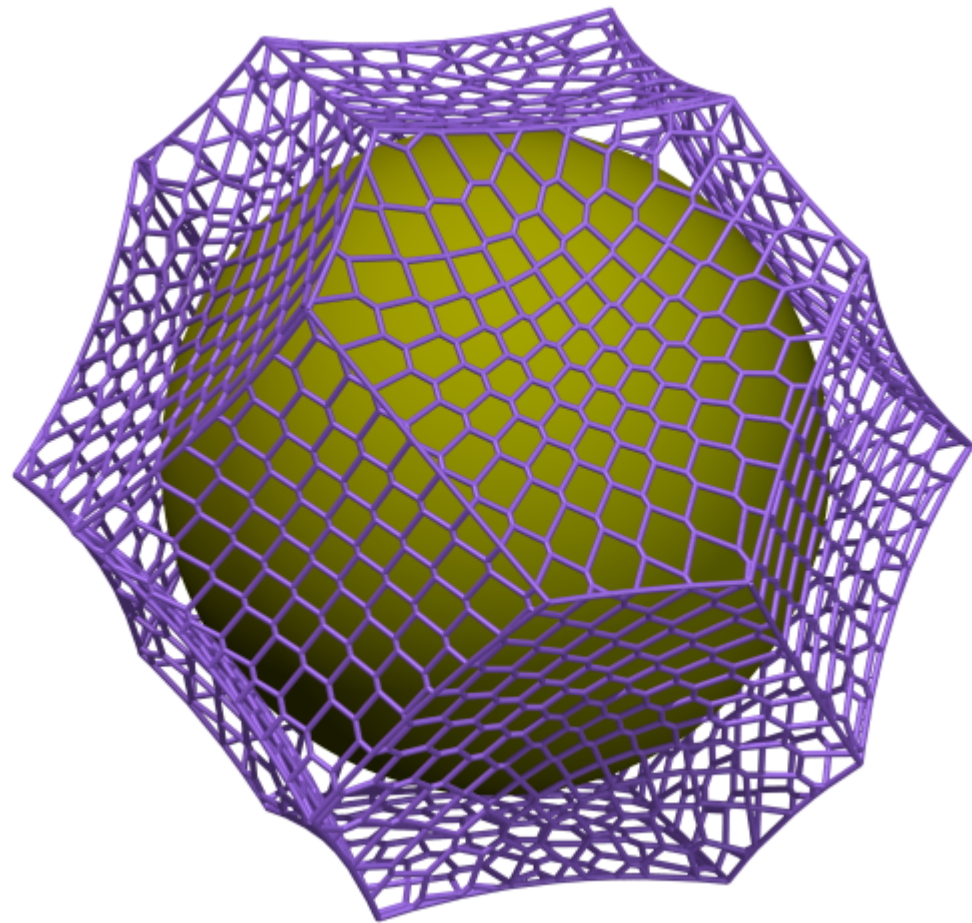

(c)

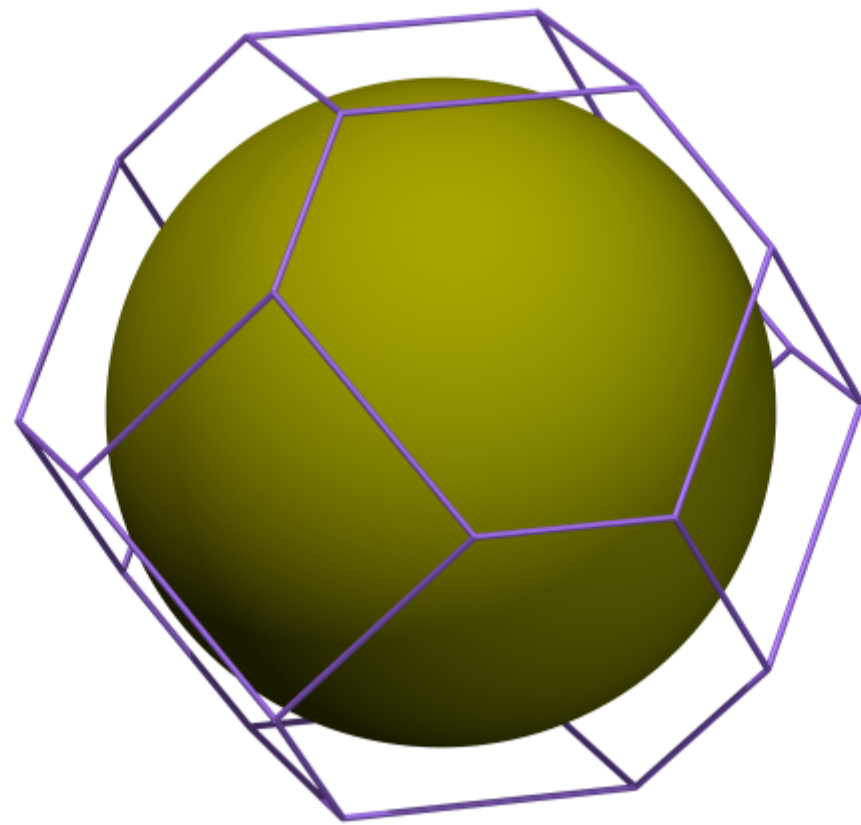

(d)

Supplement: b911140a2.pdf [file b911140a2.pdf]

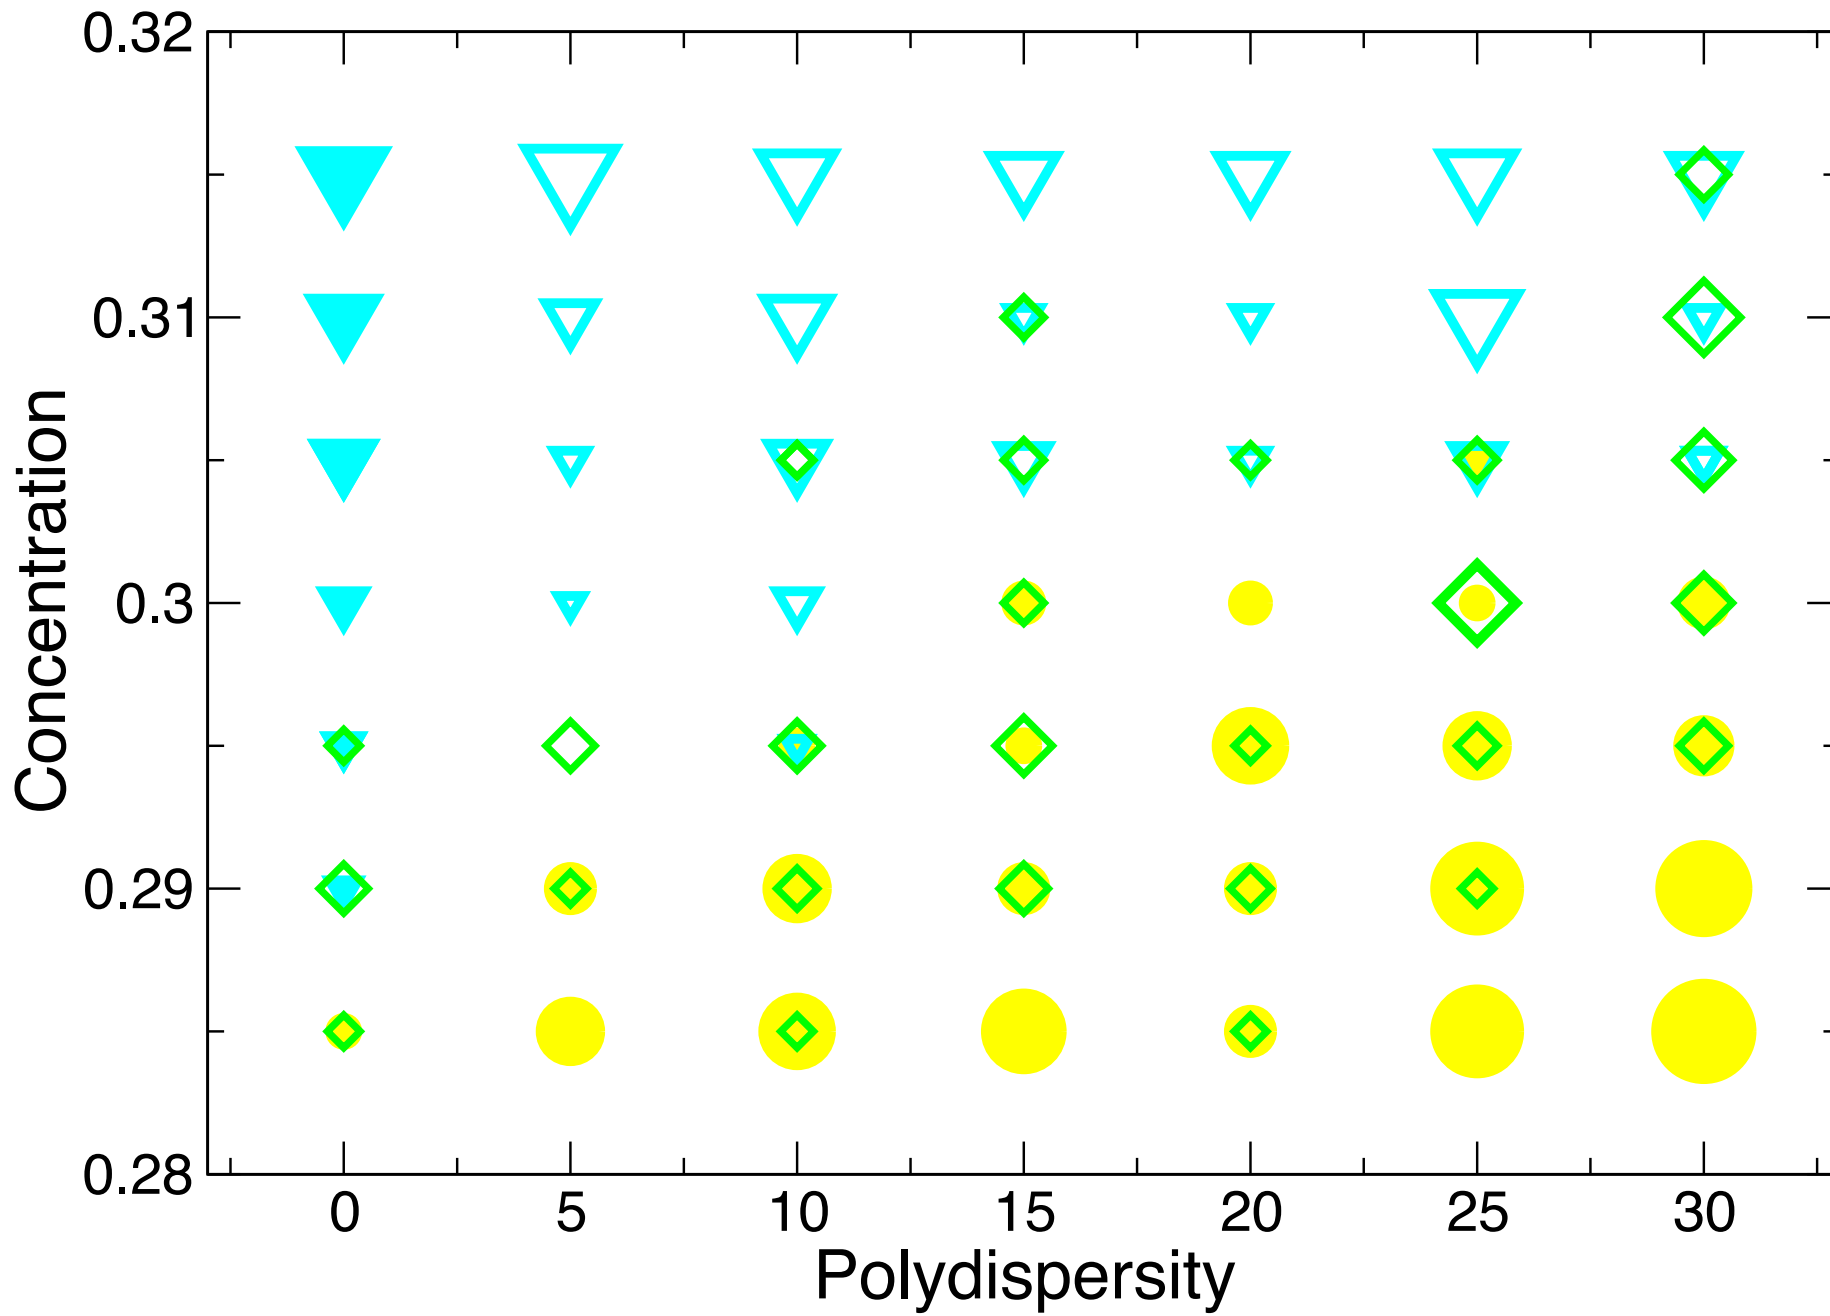

Supplement: b911140a5.pdf [file b911140a5.pdf]
